# Supplementary material
Source: publisher figshare collection journal article supplement (https://acs.figshare.com/ndownloader/files/4241134)
Supplement: Supplementary file 1 [file 4241134]

**Supporting Information for**

**Bio-inspired Design of a Cu-Zn-Imidazolate Mesoporous Silica Catalyst  
System for Superoxide Dismutation**

Ya-Cheng Fang,<sup>a</sup> Han-Chou Lin,<sup>a</sup> I-Jui Hsu,<sup>c</sup> Tien-Sung Lin,<sup>\*b</sup> and Chung-Yuan Mou<sup>\*a</sup>

<sup>a</sup> *Department of Chemistry, National Taiwan University, Taipei, Taiwan 106*

<sup>b</sup> *Department of Chemistry, Washington University, St. Louis. Missouri USA 63130*

<sup>c</sup> *Department of Molecular Science and Engineering, National Taipei University of Technology,  
Taipei, Taiwan*

\*Corresponding authors: C.Y.M: E-mail: [cymou@ntu.edu.tw](mailto:cymou@ntu.edu.tw); Tel: + 886-2-33665235; Fax: + 886-2-23660954. T.S.L: E-mail: [lin@wustl.edu](mailto:lin@wustl.edu); Tel: + 1-314-9356580; Fax, + 1-314-9354481.

**Supporting Information Available:** The list of Abbreviations, syntheses of mesoporous silicas, results of physical measurements (ICP-MS, nitrogen adsorption isotherms, XRD spectra and EPR spectra) and IC<sub>50</sub> values of mimic materials.

## Abbreviation

|                                     |                                                                                                                                                                                                                                    |
|-------------------------------------|------------------------------------------------------------------------------------------------------------------------------------------------------------------------------------------------------------------------------------|
| CuIm                                | Equivalent mixture of $\text{Cu}(\text{ClO}_4)_2 \cdot 6\text{H}_2\text{O}$ and imidazolate anion                                                                                                                                  |
| CZS                                 | (diethylenetriamine) $\text{Cu}-\mu$ -imidazolate- $\text{Zn}(\text{tris}(2\text{-aminoethyl})\text{amine})$ perchlorate or $[(\text{N}3)\text{Cu}-\mu\text{-Im}-\text{Zn}(\text{N}4)](\text{ClO}_4)_3 \cdot \text{CH}_3\text{OH}$ |
| CuZnSOD                             | Copper zinc superoxide dismutase                                                                                                                                                                                                   |
| Im                                  | Imidazole                                                                                                                                                                                                                          |
| MPS                                 | Mesoporous silica                                                                                                                                                                                                                  |
| MSN-N3                              | N3(diethylenetriamine) silanol group supported on MSN                                                                                                                                                                              |
| MSN-N3-CuIm                         | CuIm immobilized on MSN-N3 covalently                                                                                                                                                                                              |
| MSN-CZS-c                           | ZnN4 binding to MSN-CuIm covalently                                                                                                                                                                                                |
| MSN-CZS- <i>i</i> <sub>sol</sub>    | Cu(II) and Zn(II) residue in MeOH after MSN loading CZS complex via ionic exchange                                                                                                                                                 |
| N3                                  | Diethylenetriamine                                                                                                                                                                                                                 |
| N4                                  | Tris(2-aminoethyl)amine                                                                                                                                                                                                            |
| NBT                                 | Nitro blue tetrazolium                                                                                                                                                                                                             |
| $\text{O}_2^{\cdot -}$              | Superoxide anion radicals                                                                                                                                                                                                          |
| SBA-15-CuIm                         | CuIm immobilized on SBA-15-N3 covalently                                                                                                                                                                                           |
| SBA-15-CZS-c                        | ZnN4 binding to SBA-15-CuIm covalently                                                                                                                                                                                             |
| SBA-15-CZS- <i>i</i> <sub>sol</sub> | SBA-15 loading with CZS complex via ionic exchange in solution                                                                                                                                                                     |
| TMAC                                | N-trimethoxysilylpropyl-N,N,N-trimethyl-ammonium chloride                                                                                                                                                                          |
| X-CZS-i                             | CZS immobilized in X mesoporous silica, such as MSN, SBA-15, MCM-41-SH, Al-MCM-41 and Al-SBA-15 via ionic exchange                                                                                                                 |

## Experimental Section: Syntheses of Mesoporous Silicas.

**Synthesis of MSN.** MSN is nano-sized MCM-41. The size range of MSN could be between 30 to 300 nm.<sup>1</sup> It suspended in water very well and can be used as nanocarrier. The protocol of preparation was given previously.<sup>2</sup> Briefly, we synthesized MSN under low concentration of tetraethoxysilane (TEOS), surfactant and  $\text{NH}_4\text{OH}$  as base in a two-step preparation process. First,

0.58 g of cetyltrimethyl-ammonium bromide ( $C_{16}TAB$ ) was dissolved in 300 g of 0.51 M  $NH_4OH$  at 50 °C, and 5 mL of 0.21 M dilute TEOS (in ethanol) was added. After stirring for 5 h, 5 mL of 0.88 M TEOS was added, followed by stirring for another 1 h. The solution was then aged at 50 °C for 24 h. Precipitate were separated by centrifuging at 18000 rpm for 20 min, washing, and re-dispersing with ethanol several times. Surfactant templates were removed by extraction in acidic ethanol (1 g of HCl/50 mL of ethanol at reflux temperature for 24 h) and solids was re-dispersed in ethanol.

**Synthesis of particulate SBA-15 and Al-SBA-15.** A typical synthesis procedure using the triblock copolymer Pluronic P-123 as template was given previously.<sup>3</sup> Briefly, we summarize as follows: 1.4 g of P-123 was first dissolved in 50 mL deionized water at 45 °C. Second, 5.5 g sodium silicate solution (27%  $SiO_2$ ) was adjusted to a pH value of 5.0 by titration with 1.2 M sulfuric acid under stirring at 45 °C. Then two solutions were mixed and aged for 3 h. After the gel was hydrothermally treated at 100 °C for 24 h in a static autoclave, the mixture was filtered, washed with deionized water and calcined at 560 °C in air for 6 h. The Al-SBA-15 was synthesized by adding sodium aluminate (54%  $Al_2O_3$ ) to the solution of P-123 in the first step as mentioned above. The molar composition was (37)  $SiO_2$ : (1)  $Al_2O_3$ .

**Synthesis of particulate Al-MCM-41- $N^+$ .** First, a proper amount of 1.2 M sulfuric acid was added to sodium silicate solution (27%  $SiO_2$ ) to adjust its pH value to 9. The solution was added

to a C<sub>16</sub>TAB solution with sodium aluminate (54% Al<sub>2</sub>O<sub>3</sub>) under stirring at 45 °C and a gel mixture was formed. The molar composition was (37) SiO<sub>2</sub>: (1) Al<sub>2</sub>O<sub>3</sub>. Aged for 3 h, the gel was then hydrothermally treated at 100 °C for 24 h in a static autoclave. The as-synthesized product was filtered and washed thoroughly with deionized water. Then the dried product was calcined at 560 °C in air for 6 h to remove the organic templates.<sup>4</sup>

The positive charged Al-MCM-41-N<sup>+</sup> was synthesized as follows: 0.0156 mL of N-trimethoxysilylpropyl-N,N,N-trimethylammonium chloride (TMAC) was added to 0.3 g of Al-MCM-41 with 20 mL ethanol and stirred at reflux temperature for 24 h. The solids were separated by filtration, washing, and re-dispersing with ethanol several times to remove the TMAC residues.

**Synthesis of MCM-41-SH.** The materials MCM-41-SH provides stronger surface acidity because its silicon source is beta-zeolite seed.<sup>5, 6</sup> It was synthesized with short surfactant (myristyltrimethylammonium bromide (C<sub>14</sub>TAB)) as template, and put small quaternary ammonium ions (TEAOH) together in order to separately develop a zeolitic nanocluster as the silica precursor. Originally, sodium aluminate, sodium hydroxide, and tetraethylammonium hydroxide (20% wt% aqueous solution) were put together in a vessel. The fumed silica source was added to the mixture and stirred for 4 h. Then, the solution was transferred to autoclave and hydrothermal at 100 °C for 18 h to yield zeolite precursors. C<sub>14</sub>TAB was dissolved in deionized

water followed by adding zeolite precursors, and transferred to autoclave to be treated hydrothermally at 120 °C for about 48 h. Then, the solution was cooled to room temperature and adjusted pH to 10. The resulting mixture was hydrothermally treated again at 120 °C for 48 h. Finally, the solid sample was filtered, washed with deionized water and calcined at 580 °C for 3 h to remove C<sub>14</sub>TAB. The molar ratio was (37) SiO<sub>2</sub>: (1) Al<sub>2</sub>O<sub>3</sub>.

## References

- (1) Lu, F.; Wu, S. H.; Hung, Y.; Mou, C. Y. *Small* **2009**, *5*, 1408– 1413.
- (2) Lin, Y. S.; Tsai, C. P.; Huang, H. Y.; Kuo, C. T.; Hung, Y.; Huang, D. M.; Chen, Y. C.; Mou, C. Y. *Chem. Mater.* **2005**, *17*, 4570-4573.
- (3) Yang, C. M.; Liu, P. H.; Ho, Y. F.; Chiu, C. Y.; Chao, K. J. *Chem. Mater.* **2003**, *15*, 275-280.
- (4) Lin, H. P.; Mou, C. Y. *J.Cluster Sci.* **1999**, *10*, 271-293.
- (5) Liu, Y.; Zhang, W. Z.; Pinnavaia, T. J. *Angew. Chem. Int. Ed.* **2001**, *40*, 1255-1258.
- (6) Liu, L.; Chen, S. H.; Faraone, A.; Yen, C. W.; Mou, C. Y.; Kolesnikov, A. I.; Mamontov, E.; Leao, J. J. *Phys. Condens. Matter* **2006**, *18*, S2261-S2284.

**Table S1. Composition of Cu(II) and Zn(II) Ions by ICP-MS**

| After ionic exchange                     | Cu/Zn | Amount of Cu(Zn) <sup>a</sup> |
|------------------------------------------|-------|-------------------------------|
| MSN-CZS-i <sub>sol</sub> <sup>b</sup>    | 2.27  | 1526.12 (691.31)              |
| SBA-15-CZS-i <sub>sol</sub> <sup>b</sup> | 3.78  | 1925 (524)                    |

<sup>a</sup> The unit of amount is ppb. <sup>b</sup> MSN-CZS-i and SBA-15-CZS-i were obtained in MeOH after loading CZS complex via ionic exchange.

**Table S2. IC<sub>50</sub> Values of CZS Vomplex and Encapsulated Mimic Materials Before and After Hydrothermal Treatment for 24 h Measured by UV-Visible at 560 nm with Adjusting pH to 7.4**

| Sample                          | IC <sub>50</sub> (μM) |           |                   |           |
|---------------------------------|-----------------------|-----------|-------------------|-----------|
|                                 | hydrothermal 0 h      |           | hydrothermal 24 h |           |
| CZS                             | 59                    |           | 62                |           |
|                                 | 59                    | 58.6±0.6  | 59                | 60.0±1.5  |
|                                 | 58                    |           | 61                |           |
| MSN-CZS-i                       | 36                    |           | 45                |           |
|                                 | 37                    | 36.5±0.5  | 47                | 45.0±2.0  |
|                                 | 36.5                  |           | 43                |           |
| SBA-15-CZS-i                    | 47                    |           | 54.2              |           |
|                                 | 46                    | 47.0±1.0  | 56.7              | 55.1±1.4  |
|                                 | 48                    |           | 54.5              |           |
| Al-SBA-15-CZS-i                 | 30                    |           | 37                |           |
|                                 | 28                    | 28.3±1.5  | 34                | 34.6±2.1  |
|                                 | 27                    |           | 33                |           |
| MCM-41-SH-CZS-i                 | 18.5                  |           | 25.4              |           |
|                                 | 18.5                  | 18.3±0.6  | 26                | 25.8±0.4  |
|                                 | 18                    |           | 26.2              |           |
| Al-MCM-41-N <sup>+</sup> -CZS-i | 2.3                   |           | 7.8               |           |
|                                 | 1.9                   | 1.9±0.3   | 7                 | 8.4±0.6   |
|                                 | 1.7                   |           | 8.1               |           |
| MSN-CZS-c                       | 44                    |           | 43                |           |
|                                 | 43.5                  | 43.8±0.3  | 45                | 45.6±3.1  |
|                                 | 44                    |           | 49                |           |
| SBA-15-CZS-c                    | 56                    |           | 60                |           |
|                                 | 55                    | 55.3±0.6  | 63                | 61.0±1.7  |
|                                 | 55                    |           | 60                |           |
| MSN- N3-CuIm                    | 117                   |           | 124               |           |
|                                 | 118                   | 117.7±0.6 | 127               | 124.0±3.0 |
|                                 | 118                   |           | 121               |           |
| SBA-15- N3-CuIm                 | 122                   |           | 122               |           |
|                                 | 119                   | 120.0±1.7 | 124               | 122.7±1.2 |
|                                 | 119                   |           | 122               |           |

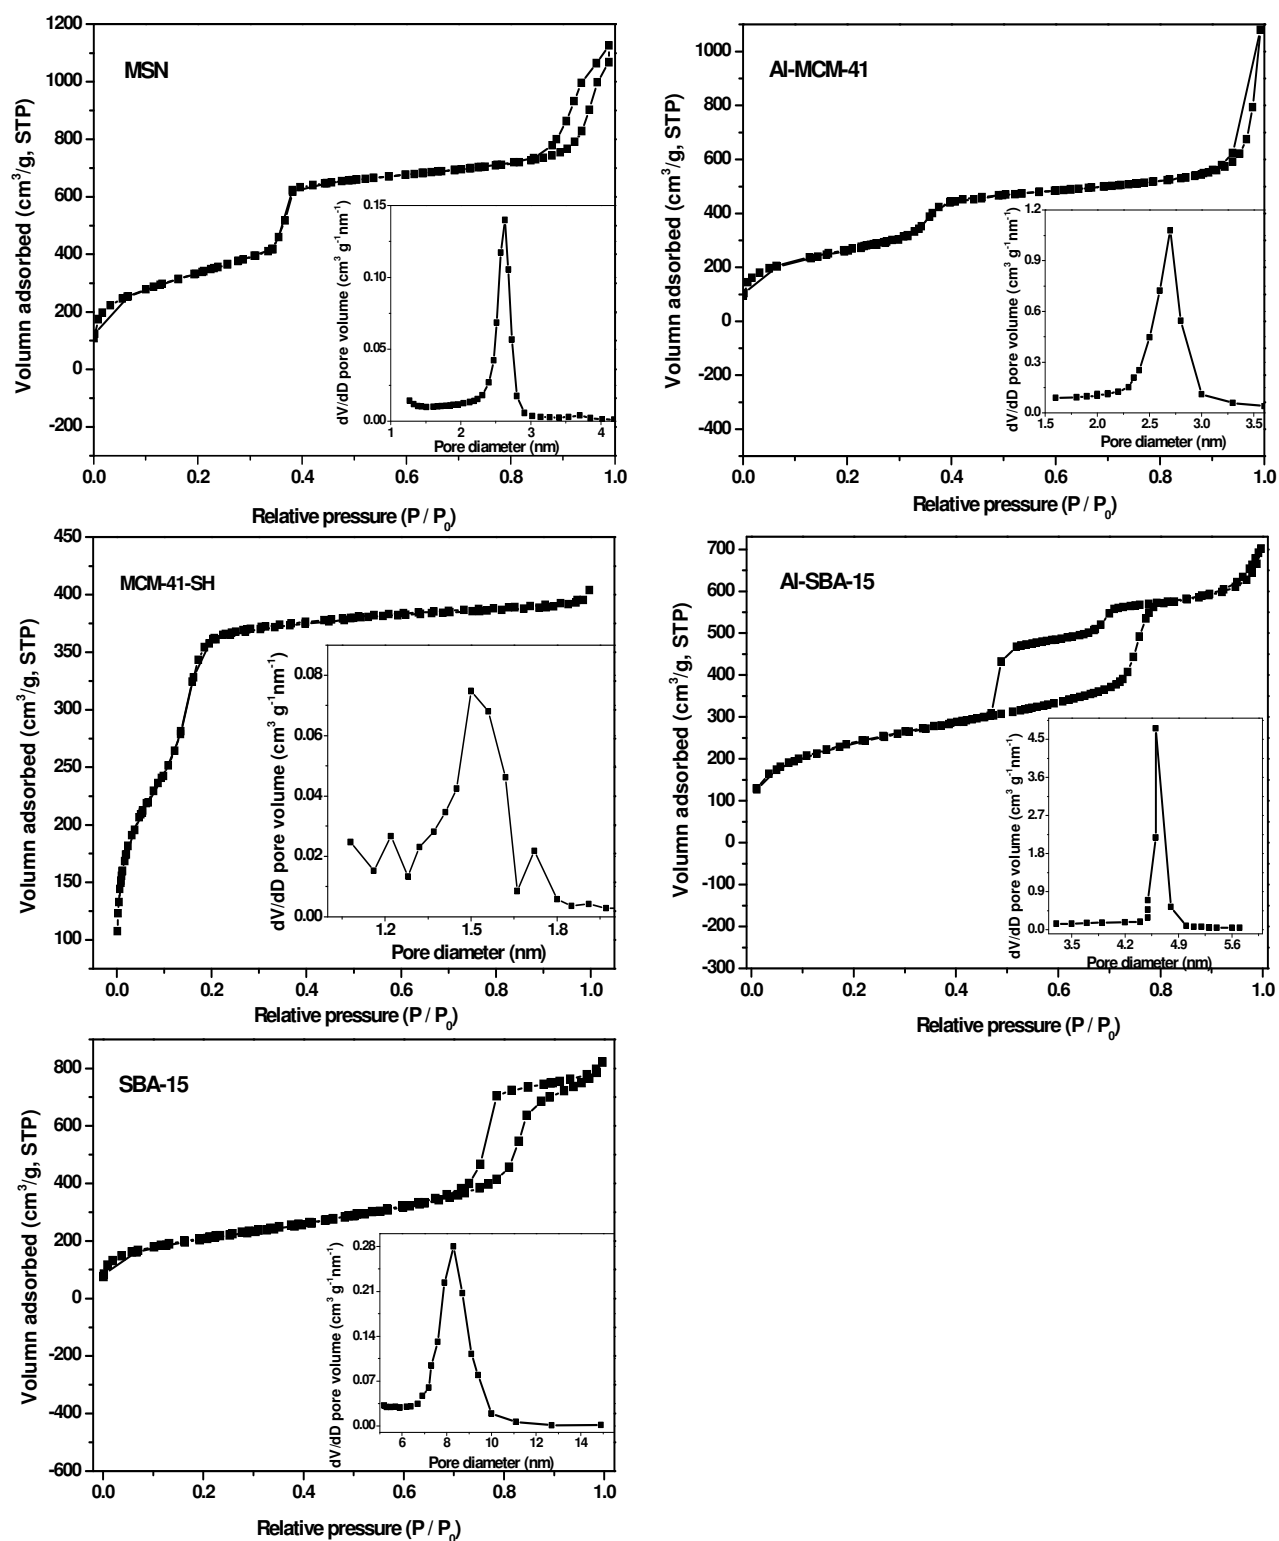

**Figure S1.** Nitrogen adsorption isotherms of various MPS samples (inset: BJH pore size distribution).



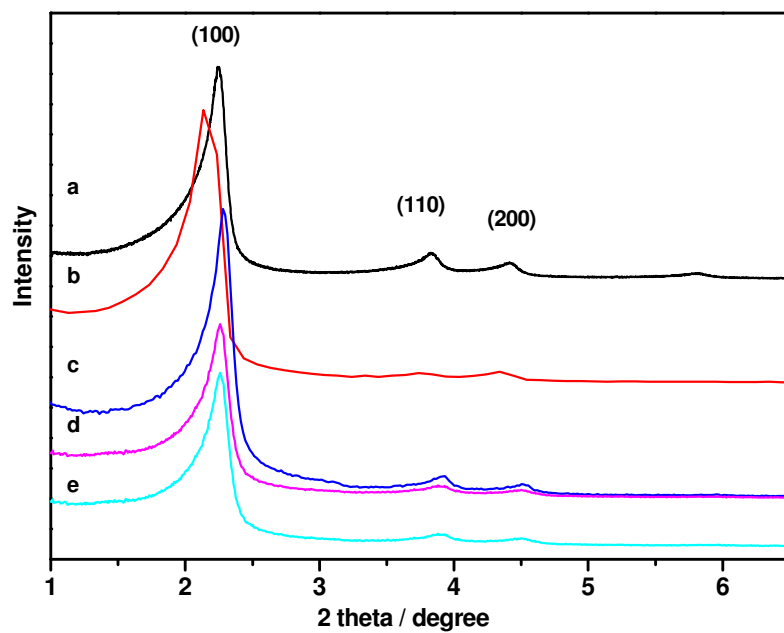

**Figure S2.** Small-angle powder XRD patterns of (a) MSN, (b) MSN-N3, (c) MSN-N3-CuIm, (d) MSN-CZS-c and (e) MSN-CZS-i.

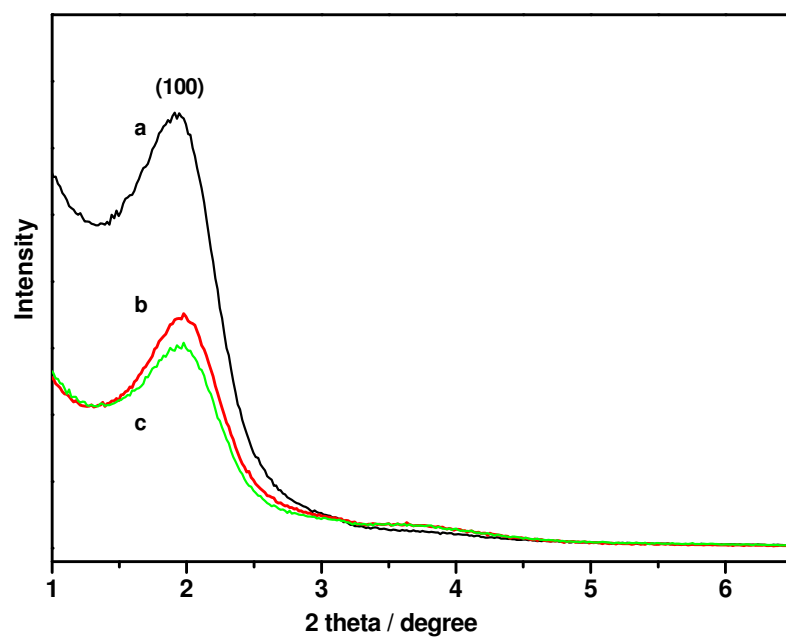

**Figure S3.** Small-angle powder XRD patterns of (a) Al-MCM-41, (b) Al-MCM-41-N<sup>+</sup> and (c) Al-MCM-41-N<sup>+</sup>-CZS-i.

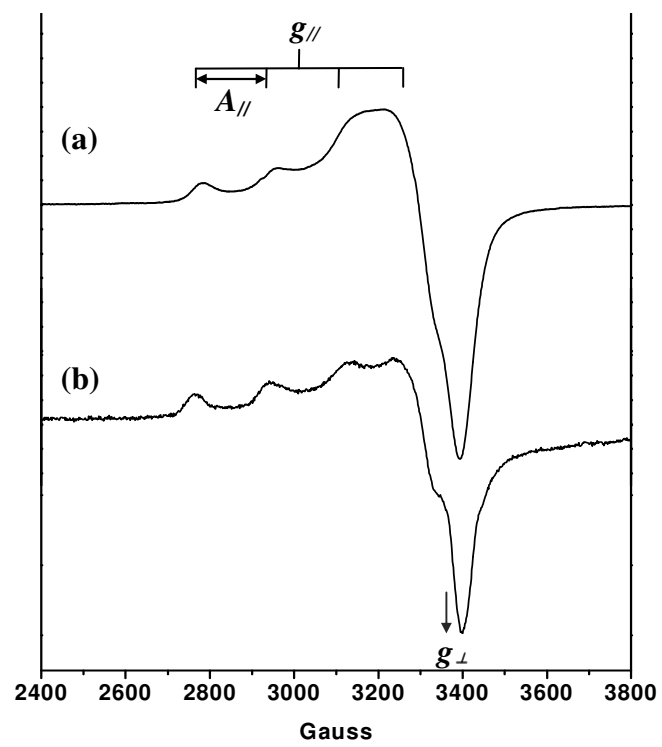

**Figure S4.** X-band EPR spectra of (a) MSN-N3-CuIm and (b) SBA-15-N3-CuIm at 77 K.
